# Supplementary material for: Simulation-based Reconstructed Diffusion unveils the effect of aging on protein diffusion in Escherichia coli
Source: PubMed Central journal article supplement (PMC10513214; doi:10.1371/journal.pcbi.1011093), 2023-09-11
Supplement: pcbi.1011093.s002.pdf [file pcbi.1011093.s002.pdf]

## Supporting text - Diffusion on a closed interval

Let us consider the diffusion problem

$$\frac{\partial p(x, t)}{\partial t} = D \frac{\partial^2 p(x, t)}{\partial x^2}, \quad (1)$$

where  $a \leq x \leq b$  and  $x_0 \in [a, b]$ ,  $p(x, t)$  stands for the probability of finding a particle in position  $x$  at time  $t$ , and  $D$  is the diffusion constant of the medium. In other words, we are considering a diffusion problem in the closed interval  $[a, b]$  with initial condition  $p(x, 0) = \delta(x - x_0)$ , with  $\delta(\cdot)$  denoting the Dirac-delta. Furthermore, we assume the boundary conditions

$$\left. \frac{\partial p(x, t)}{\partial x} \right|_{x=a} = \left. \frac{\partial p(x, t)}{\partial x} \right|_{x=b} = 0, \quad (2)$$

accounting for the ‘‘rigid’’ reflection at the boundaries of the interval. These are generally known as Neumann boundary conditions.

To simplify the computations, we translate the previous setting into a diffusion problem defined on the closed interval  $[-\ell/2, \ell/2]$ . This is done by defining  $y = \alpha x + \beta$  with  $\alpha = \frac{b-a}{\ell}$  and  $\beta = \frac{a+b}{2}$ . Denoting by  $\bar{p}$  the re-scaled probability function, we now have the diffusion problem

$$\frac{\partial \bar{p}(y, t)}{\partial t} = \bar{D} \frac{\partial^2 \bar{p}(y, t)}{\partial y^2}, \quad \bar{p}(y, 0) = \delta(y - y_0), \quad \left. \frac{\partial \bar{p}(y, t)}{\partial y} \right|_{y=\pm \frac{\ell}{2}} = 0. \quad (3)$$

To find the solution to the diffusion equation (10) we propose the ansatz

$$\bar{p}(y, t) = \bar{\phi}(y) e^{-\gamma t}. \quad (4)$$

Substituting (11) in (10) we get

$$\frac{\partial^2 \bar{\phi}}{\partial y^2}(y) + \omega^2 \bar{\phi}(y) = 0, \quad (5)$$

where  $\omega^2 = \frac{\gamma}{\bar{D}}$ .

The eigenvalue problem given by (12) is that of an harmonic oscillator. This tells us that its solution is given by a linear combination of the eigenfunctions

$$\begin{aligned} \bar{\phi}_n^e &= A_n \cos(\omega_n^e y) \\ \bar{\phi}_n^o &= B_n \sin(\omega_n^o y), \end{aligned} \quad (6)$$

corresponding to the even and odd harmonics, respectively. The boundary conditions are translated into:

$$\begin{aligned} \frac{\partial \bar{\phi}_n^e}{\partial y}(\pm \ell/2) &= -\omega_n^e A_n \sin\left(\pm \omega_n^e \frac{\ell}{2}\right) = 0 \\ \frac{\partial \bar{\phi}_n^o}{\partial y}(\pm \ell/2) &= \omega_n^o B_n \cos\left(\pm \omega_n^o \frac{\ell}{2}\right) = 0, \end{aligned} \quad (7)$$

which imply:

$$\begin{aligned}\omega_n^e &= \frac{2n\pi}{\ell}, \\ \omega_n^o &= \frac{(2n+1)\pi}{\ell},\end{aligned}\tag{8}$$

respectively. Therefore, we have that

$$\bar{\phi}(y) = \sum_{n=0}^{\infty} A_n \cos\left(\frac{2n\pi}{\ell}y\right) + B_n \sin\left(\frac{(2n+1)\pi}{\ell}y\right)\tag{9}$$

On the other hand, the ansatz (9) must also satisfy  $\int_{-\ell/2}^{\ell/2} \bar{\phi}(y)dy = 1$ , therefore:

$$\begin{aligned}1 &= \int_{-\ell/2}^{\ell/2} \left( \sum_{n=0}^{\infty} A_n \cos\left(\frac{2n\pi}{\ell}y\right) + B_n \sin\left(\frac{(2n+1)\pi}{\ell}y\right) \right) dy \\ &= \left( \sum_{n=0}^{\infty} \frac{A_n \ell}{2n\pi} \sin\left(\frac{2n\pi}{\ell}y\right) - \frac{B_n \ell}{(2n+1)\pi} \cos\left(\frac{(2n+1)\pi}{\ell}y\right) \right) \Big|_{-\ell/2}^{\ell/2} \\ &= \sum_{n=0}^{\infty} \frac{A_n \ell}{n\pi} \sin(n\pi) = A_0 \ell,\end{aligned}\tag{10}$$

which implies  $A_0 = \frac{1}{\ell}$ . The rest of the coefficients of (9) are obtained from the initial conditions as follows.

The Fourier series of  $\delta(\xi)$ , for  $\xi \in [-\pi, \pi]$  is

$$\delta(\xi) = \frac{1}{2\pi} + \frac{1}{\pi} \sum_{n=1}^{\infty} \cos(n\xi).\tag{11}$$

By shifting and re-scaling as previously, we can write the Fourier series of  $\delta(y - y_0)$ , with  $y_0 \in [-\ell/2, \ell/2]$ , as

$$\delta(y - y_0) = \frac{1}{\ell} + \frac{2}{\ell} \sum_{n=1}^{\infty} \cos\left(\frac{2\pi n}{\ell}(y - y_0)\right).\tag{12}$$

So, since (9) is independent of time we immediately get

$$\bar{\phi}(y) = \frac{1}{\ell} + \frac{2}{\ell} \sum_{n=1}^{\infty} \cos\left(\frac{2\pi n}{\ell}(y - y_0)\right).\tag{13}$$

This leads to

$$\bar{p}(y, t) = \left( \frac{1}{\ell} + \frac{2}{\ell} \sum_{n=1}^{\infty} \cos\left(\frac{2\pi n}{\ell}(y - y_0)\right) \right) e^{-\gamma t},\tag{14}$$

where, by definition,  $\omega^2 = \frac{4\pi^2 n^2}{\ell^2}$  and therefore  $\gamma = \frac{4\pi^2 n^2}{\ell^2} \bar{D}$ . Returning to the original coordinate  $x$ , we finally obtain:

$$p(x, t) = \frac{1}{b-a} + \frac{2}{b-a} \sum_{n=1}^{\infty} \cos\left(\frac{2\pi n}{b-a}(x-x_0)\right) \exp\left(-\frac{4\pi^2 n^2 D}{(b-a)^2} t\right). \quad (15)$$
