# Supplementary material for: Simulation-based Reconstructed Diffusion unveils the effect of aging on protein diffusion in Escherichia coli
Source: PubMed Central journal article supplement (PMC10513214; doi:10.1371/journal.pcbi.1011093), 2023-09-11
Supplement: pcbi.1011093.s003.pdf [file pcbi.1011093.s003.pdf]

---

**Algorithm 1** General algorithm used to estimate the diffusion coefficient from the billiard approach. We assume that the coordinate system is located at the center of the billiard.

---

**procedure** ESTIMATE  $D(p_0, p_f, R, L)$

1:  $d_0 = \|p_f - p_0\|$

2:  $d_1 = F_s(p_0, p_f, L, R) + F_c(p_0, p_f, L, R)$

3: Using  $\tilde{\rho}(d, t) = \rho(d_0, t) + \rho(d_1, t)$ , where  $\rho(d, t) = \frac{1}{4\pi Dt} \exp\left(-\frac{d^2}{4Dt}\right)$  perform a maximum likelihood estimation using  $D$  as fitting parameter.

**end procedure**

**function**  $F_s(p_0, p_f, L, R)$

# Reflection points on straight segments

$(x_0, y_0) \leftarrow p_0$

$(x_f, y_f) \leftarrow p_f$

$x_c^u = \frac{(R-y_0)(x_f-x_0)}{2R-y_f-y_0} + x_0$

#  $x$ -coordinate of the upper point

$x_c^b = \frac{(-R-y_0)(x_f-x_0)}{-2R-y_f-y_0} + x_0$

#  $x$ -coordinate of the bottom point

**if**  $|x_c^u| \leq L/2$  **then**

$p_c = (x_c^u, R)$

$d_u = \|p_c - p_0\| + \|p_c - p_f\|$

**else**

$d_u = 0$

**end if**

**if**  $|x_c^b| \leq L/2$  **then**

$p_c = (x_c^b, -R)$

$d_b = \|p_c - p_0\| + \|p_c - p_f\|$

**else**

$d_b = 0$

**end if**

**return**  $d_u + d_b$

**end function**

**function**  $F_c(p_0, p_f, L, R)$

# Reflection points on curved segments

$p_f \mapsto p_f - \frac{L}{2}$

# The next computation is done with the origin at  $(L/2, 0)$

$P_c = (x_c, y_c) \leftarrow$  solution from (8)

# May give more than one solution. In that case  $P_c$  is an array of tuples  $p_c = (x_c, y_c)$

$d_r = \sum_{\substack{p_c \in P_c \\ x_c > 0}} \|p_c - p_0\| + \|p_c - p_f\|$

# Add up all 1-bounce distances of points reflecting on the right circular segment

$p_f \mapsto p_f + \frac{L}{2}$

# The next computation is done with the origin at  $(-L/2, 0)$

$P_c = (x_c, y_c) \leftarrow$  solution from (8)

# May give more than one solution. In that case  $P_c$  is an array of tuples  $p_c = (x_c, y_c)$

$d_l = \sum_{\substack{p_c \in P_c \\ x_c < 0}} \|p_c - p_0\| + \|p_c - p_f\|$

# Add up all 1-bounce distances of points reflecting on the left circular segment

**return**  $d_r + d_l$

**end function**

---
