# Supplementary material for: Simulation-based Reconstructed Diffusion unveils the effect of aging on protein diffusion in Escherichia coli
Source: PubMed Central journal article supplement (PMC10513214; doi:10.1371/journal.pcbi.1011093), 2023-09-11
Supplement: pcbi.1011093.s011.pdf [file pcbi.1011093.s011.pdf]

## Supporting Table

| Construct ID | UNIPROT ID | Protein name | Number of cells | Abundance (copies/cell) | Loneliness | MW (kDa) | Oligomeric state | complex mass (kDa) | $D_{app}^{center}$ |                    |
|--------------|------------|--------------|-----------------|-------------------------|------------|----------|------------------|--------------------|--------------------|--------------------|
|              |            |              |                 |                         |            |          |                  |                    | mean               | standard deviation |
| 1            | VUXFR*     | mEos3.2      | 30              | --                      | --         | 25.7     | 1                | 25.7               | 11.4               | 1.6                |
| 3            | P00934     | ThrC         | 31              | 11109                   | 0.350      | 47.1     | 1                | 72.8               | 7.8                | 1.1                |
| 8            | 90AC62     | GrxC         | 26              | 6170                    | 89.400     | 9.1      | 1                | 34.8               | 10.3               | 1.3                |
| 9            | P05793     | IlvC         | 22              | 29065                   | 36.200     | 54.0     | 4                | 318.9              | 2.9                | 0.5                |
| 11           | P08997     | AceB         | 28              | 8308                    | 10.400     | 60.2     | 1                | 85.9               | 6.9                | 1.1                |
| 12           | P0A6A8     | AcpP         | 38              | 28863                   | 0.120      | 8.6      | 1                | 34.3               | 9.6                | 1.6                |
| 13           | P0ACC3     | ErpA         | 22              | 3460                    | 0.100      | 12.1     | 2                | 75.5               | 7.8                | 1.1                |
| 15           | P0AA25     | TrxA         | 33              | 18242                   | 0.025      | 11.8     | 1                | 37.5               | 8.7                | 1.8                |
| 16           | P07813     | LeuS         | 20              | 1505                    | 0.005      | 97.2     | 1                | 122.9              | 4.1                | 0.8                |
| 19           | P08200     | lcd          | 23              | 24591                   | 1.020      | 45.7     | 2                | 142.8              | 5.0                | 0.9                |
| 15_hvo       | AOA558GCJ2 | TrxA2_hvo    | 23              | --                      | --         | 12.1     | 1                | 37.8               | 8.1                | 1.2                |
| 15_lla       | AOA089XQE8 | TrxA_lla     | 24              | --                      | --         | 11.7     | 1                | 37.4               | 6.6                | 1.3                |

**Supporting Table 1. Dataset from (14).** The cell numbers represent single, non-dividing cells without visible aggregation of the expressed protein. The columns show the target protein, number of analyzed cells, abundance, loneliness, molecular weight, oligomeric state (1 - monomer, 2 - homodimer, 4 - homotetramer)', and complex mass. The complex mass is the sum of the molecular weight of the monomeric protein plus mEos3.2 and multiplied by the oligomeric state number. The mean and SD of  $D_{app}^{center}$  are shown in the last two columns. The UniProt ID is reported for all proteins, except for mEos3.2, for which the Fpbse ID is given.
